# Supplementary material for: Comparative Study on the Phenolic Fingerprint and Antioxidant Activity of Strawberry Tree (Arbutus unedo L.) Leaves and Fruits
Source: MDPI journal article supplement (doi:10.3390/plants11010025), 2021-12-22
Supplement: s1 [file s1]

Article

## Comparative Study on the Phenolic Fingerprint and Antioxidant Activity of Strawberry Tree (*Arbutus unedo* L.) Leaves and Fruits

Irena Brčić Karačonji <sup>1,2,\*,#</sup>, Karlo Jurica <sup>3,#</sup>, Uroš Gašić <sup>4,\*</sup>, Aleksandra Dramićanin <sup>5</sup>, Živoslav Tešić <sup>5</sup> and Dušanka Milojković Opsenica <sup>5</sup>

<sup>1</sup> Analytical Toxicology and Mineral Metabolism Unit, Institute for Medical Research and Occupational Health, Ksaverska cesta 2, 10000 Zagreb, Croatia; ibrcic@imi.hr (I.B.K.)

<sup>2</sup> Faculty of Health Studies, University of Rijeka, Viktora Cara Emina 5, 51000 Rijeka, Croatia

<sup>3</sup> Special Security Operations Directorate, Ministry of the Interior, Ulica grada Vukovara 33, 10000 Zagreb, Croatia; juricakarlo@gmail.com (K.J.)

<sup>4</sup> Institute for Biological Research "Siniša Stanković"–National Institute of Republic of Serbia, University of Belgrade, Bulevar despota Stefana 142, 11060 Belgrade, Serbia; uros.gasic@ibiss.bg.ac.rs (U.G.)

<sup>5</sup> Faculty of Chemistry, University of Belgrade, Studentski trg 12-16, 11158 Belgrade, Serbia; akosovic@chem.bg.ac.rs (A.D.); ztesic@chem.bg.ac.rs (Ž.T.); dusankam@chem.bg.ac.rs (D.M.O.)

\* Correspondence: ibrcic@imi.hr (I.B.K.); uros.gasic@ibiss.bg.ac.rs (U.G.)

# Equally contributed (I.B.K. and K.J.)

**Figure S1.** Proposed fragmentation pathway of compound 42 (kaempferol 3-O-(6''-galloyl)hexoside).

**Table S1.** The list of phenolic compounds with regression equation parameters, correlation coefficients, limits of detection (LOD) and quantification (LOQ), obtained from the calibration curves.

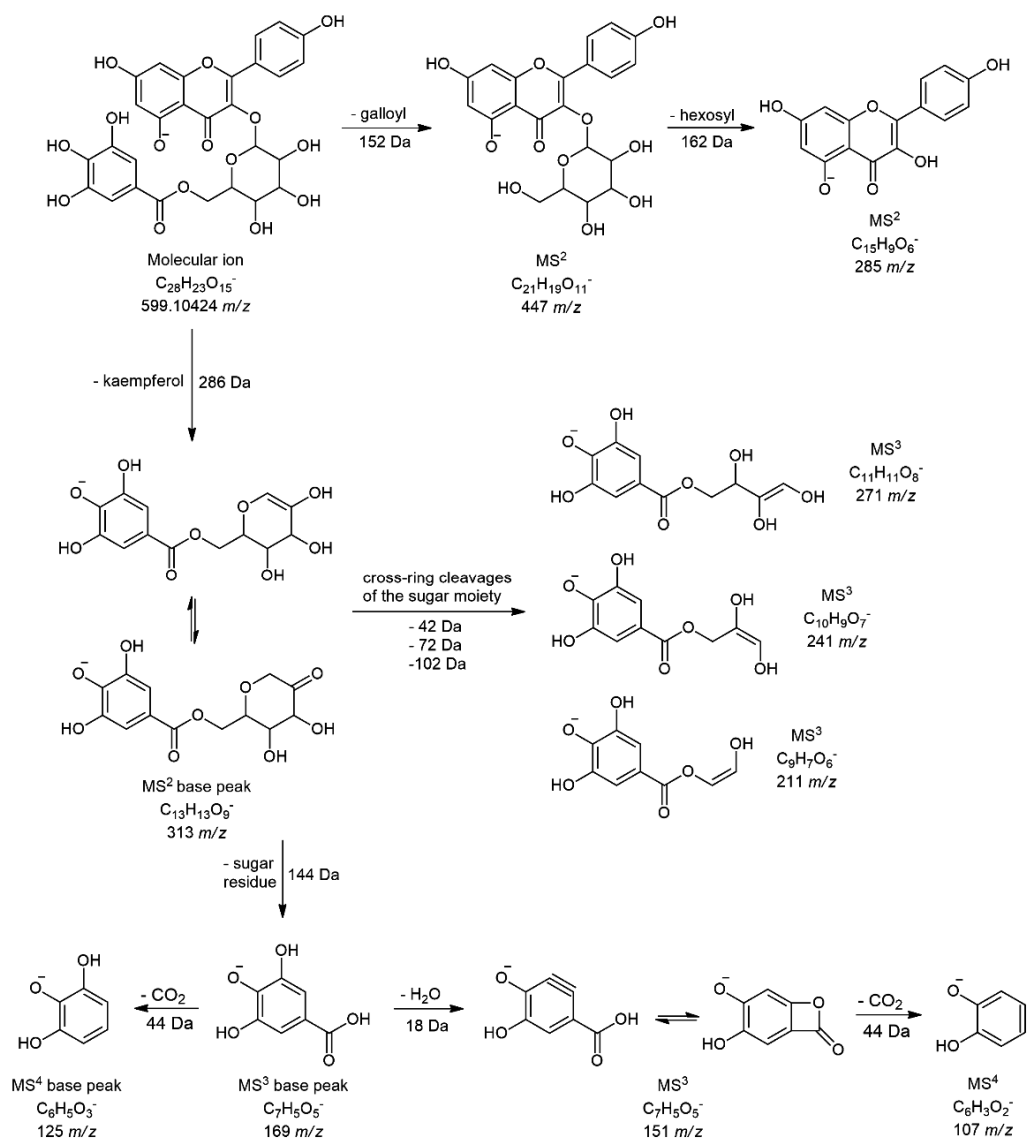

Figure S1

Table S1

| No | Compounds                          | Regression equation (Y = A + BX) |                            | R <sup>2</sup> | LOD,<br>mg/L | LOQ,<br>mg/L |
|----|------------------------------------|----------------------------------|----------------------------|----------------|--------------|--------------|
|    |                                    | (A ± SE) × 10 <sup>5</sup>       | (B ± SE) × 10 <sup>5</sup> |                |              |              |
| 1  | Gallic acid                        | - 3.22 ± 1.11                    | 72.56 ± 2.64               | 0.9961         | 0.06         | 0.21         |
| 2  | Gallocatechin                      | - 5.41 ± 0.81                    | 32.05 ± 1.57               | 0.9952         | 0.06         | 0.21         |
| 3  | Protocatechuic acid                | 2.66 ± 1.36                      | 223.63 ± 2.63              | 0.9993         | 0.03         | 0.10         |
| 4  | Aesculin                           | - 0.16 ± 1.27                    | 156.22 ± 2.66              | 0.9985         | 0.04         | 0.15         |
| 5  | Chlorogenic acid                   | - 4.01 ± 1.69                    | 94.49 ± 2.88               | 0.9963         | 0.08         | 0.27         |
| 6  | Catechin                           | - 1.17 ± 1.43                    | 112.93 ± 3.71              | 0.9957         | 0.06         | 0.21         |
| 7  | <i>p</i> -Hydroxybenzoic acid      | 8.35 ± 4.69                      | 359.63 ± 10.99             | 0.9963         | 0.07         | 0.22         |
| 8  | Caffeic acid                       | - 0.12 ± 1.20                    | 223.33 ± 2.45              | 0.9994         | 0.03         | 0.10         |
| 9  | Syringic acid                      | 2.42 ± 3.34                      | 236.76 ± 6.12              | 0.9967         | 0.08         | 0.25         |
| 10 | Vanillic acid                      | 2.84 ± 2.62                      | 223.66 ± 5.28              | 0.9972         | 0.06         | 0.21         |
| 11 | Rutin                              | - 3.43 ± 1.19                    | 155.02 ± 2.10              | 0.9991         | 0.04         | 0.14         |
| 12 | <i>p</i> -Hydroxyphenylacetic acid | 5.66 ± 2.58                      | 180.38 ± 4.77              | 0.9965         | 0.08         | 0.26         |
| 13 | Hyperoside                         | - 3.96 ± 1.43                    | 129.05 ± 2.76              | 0.9977         | 0.06         | 0.20         |
| 14 | <i>p</i> -Coumaric acid            | 8.11 ± 4.37                      | 313.16 ± 8.62              | 0.9962         | 0.08         | 0.25         |
| 15 | Catechin gallate                   | - 9.18 ± 2.99                    | 50.19 ± 3.11               | 0.9924         | 0.20         | 0.68         |
| 16 | Ferulic acid                       | 6.04 ± 5.97                      | 251.15 ± 5.74              | 0.9974         | 0.13         | 0.43         |
| 17 | Myricetin                          | 0.11 ± 0.28                      | 28.11 ± 0.73               | 0.9980         | 0.04         | 0.14         |
| 18 | Quercetin                          | - 8.99 ± 7.31                    | 183.45 ± 8.87              | 0.9927         | 0.18         | 0.60         |
| 19 | Naringenin                         | - 8.30 ± 5.74                    | 409.51 ± 9.70              | 0.9972         | 0.08         | 0.25         |
| 20 | Kaempferol                         | - 6.94 ± 2.31                    | 119.60 ± 7.62              | 0.9920         | 0.07         | 0.24         |

SE – standard error; LOD–limit of detection; LOQ–limit of quantification.
